# Supplementary material for: Mechanistic studies on oxidation of l-ascorbic acid by an oxo-bridged diiron complex in aqueous acidic media
Source: Royal Society of Chemistry journal article supplement (doi:10.1039/b615593f), 2007-01-01
Supplement: b615593f.pdf [file b615593f.pdf]

## ESI (ELECTRONIC SUPPLEMENTARY INFORMATION)

Title of the manuscript: **Mechanistic studies on oxidation of L-Ascorbic acid by an oxo-bridged diiron complex in aqueous acidic media**

Jhimli Bhattacharyya, Suranjana Das and Subrata Mukhopadhyay

Department of Chemistry, Jadavpur University, Calcutta 700 032, India

**Estimation of  $(K_1)_{\max}$ , the maximum possible value of the pre-equilibrium constant for the inner-sphere adduct formation between **1** and  $\text{HA}^-$**

From *Scheme 1* (see text)

$$[\mathbf{2}] = K_{a1}[\mathbf{1}]/[\text{H}^+] \quad (\text{S1})$$

$$[\mathbf{3}] = K_{a1}K_{a2}[\mathbf{1}]/[\text{H}^+]^2 \quad (\text{S2})$$

$$[\mathbf{I}_1] = K_1[\mathbf{1}][\text{HA}^-] \quad (\text{S3})$$

$$[\mathbf{I}_2] = K_2K_{a1}[\mathbf{1}][\text{HA}^-]/[\text{H}^+] \quad (\text{S4})$$

$$\text{Total iron concentration, } T_c = [\mathbf{1}] + [\mathbf{2}] + [\mathbf{3}] + [\mathbf{I}_1] + [\mathbf{I}_2] \quad (\text{S5})$$

$$\text{or, } T_c = [\mathbf{1}] + K_{a1}[\mathbf{1}]/[\text{H}^+] + K_{a1}K_{a2}[\mathbf{1}]/[\text{H}^+]^2 + K_1[\mathbf{1}][\text{HA}^-] + K_2K_{a1}[\mathbf{1}][\text{HA}^-]/[\text{H}^+] \quad (\text{S6})$$

Rearranging,

$$[\mathbf{1}] = T_c[\text{H}^+]^2 / \{([\text{H}^+]^2 + K_{a1}[\text{H}^+] + K_{a1}K_{a2}) + (K_1[\text{HA}^-][\text{H}^+]^2 + K_2K_{a1}[\text{HA}^-][\text{H}^+])\} \quad (\text{S7})$$

The minimum value of  $([\text{H}^+]^2 + K_{a1}[\text{H}^+] + K_{a1}K_{a2})$  will be at highest experimental pH viz. 5.5, is of the order of  $10^{-9}$ .

Assuming  $(K_1[\text{HA}^-][\text{H}^+]^2 + K_2K_{a1}[\text{HA}^-][\text{H}^+]) \ll ([\text{H}^+]^2 + K_{a1}[\text{H}^+] + K_{a1}K_{a2})$  as both  $K_1$  and  $K_2$  are expected to be small, it results,

$$\{(K_1[\text{HA}^-][\text{H}^+]^2 + K_2K_{a1}[\text{HA}^-][\text{H}^+])\}_{\max} \leq 10^{-10} \quad (\text{S8})$$

The maximum value of  $(K_1[\text{HA}^-][\text{H}^+]^2 + K_2K_{a1}[\text{HA}^-][\text{H}^+])$  will be arising from the lowest experimental pH (3.00) with highest experimental  $[\text{H}_2\text{A}]_T$  ( $5 \times 10^{-3}$  M) and can be expressively written as  $5 \times 10^{-10}K_1 + 10 \times 10^{-10}K_2$  and thus the inequality (Equation S8) becomes,

$$5 \times 10^{-10}K_1 + 10 \times 10^{-10}K_2 \leq 10^{-10} \quad (\text{S9})$$

An estimated  $(K_1)_{\text{max}}$  will be thus be  $10^{-1}$  and  $K_2$  will be further less.

We are thus able to write Equation (S7) as,

$$[\mathbf{1}] = T_c[\text{H}^+]^2 / ([\text{H}^+]^2 + K_{a1}[\text{H}^+] + K_{a1}K_{a2}) \quad (\text{S10})$$

$$\text{Rate of the reaction} = T_c \times k_0$$

$$\text{Therefore, } T_c \times k_0 = k_1[\mathbf{I}_1][\text{HA}^-] + k_2[\mathbf{I}_2][\text{HA}^-] \text{ (from Scheme 1, see text)} \quad (\text{S11})$$

Hence, using Equations (S3), (S4), (S10) and Equation (4) of the text, Equation (S11) becomes,

$$k_0([\text{H}^+]^2 + K_{a1}[\text{H}^+] + K_{a1}K_{a2})(K_a + [\text{H}^+])^2 / ([\text{H}^+]^2[\text{H}_2\text{A}]_T^2K_a^2) = k_1K_1 + k_2K_2K_{a1}(1/[\text{H}^+])$$

This is the Equation 9 of the text.

**Evidence of precursor complex (adduct) formation between the diiron(III,III) complex and ascorbate**

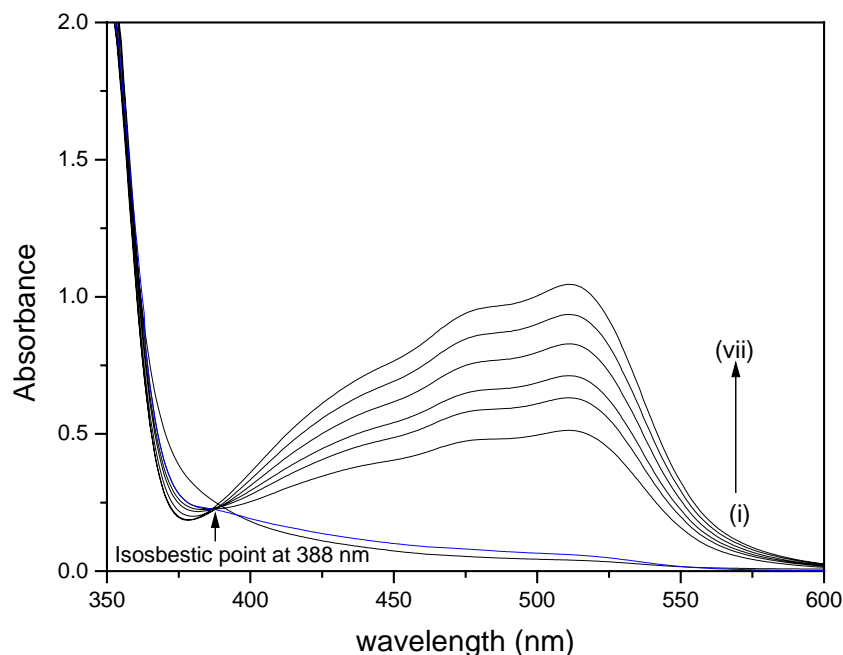

**Figure S1.** The spectrum of  $5 \times 10^{-5}$  M diiron(III,III) complex solution at  $[\text{phen}] = 3.0 \times 10^{-3}$  M,  $I = 1.0$  M ( $\text{NaNO}_3$ ) is shown in (i). The spectrum of the diiron(III,III) complex is independent on the pH range 3.0 – 6.0. The curve shown in blue is constructed by plotting absorbances measured immediately after mixing the reagents with  $\lambda$  when  $5 \times 10^{-5}$  M diiron(III,III) complex is reacted with  $2.5 \times 10^{-4}$  M ascorbic acid at pH 3.00 in presence of  $3 \times 10^{-3}$  M phen ( $25.0^\circ\text{C}$ ,  $I = 1.0$  M ( $\text{NaNO}_3$ )). The plot of the absorbances thus found at very initial times with  $\lambda$  (dotted line) significantly differ from (i), the spectrum of the pure diiron(III,III) complex, indicating formation of precursor complex between the diiron(III,III) complex and ascorbate. The spectra (ii) – (vi) represent those of equilibrium mixtures of the complex with several stoichiometrically deficient amount of ascorbic acid concentration ( $[\text{H}_2\text{A}]_{\text{T}}$  in mM = 0.025, 0.030, 0.035, 0.040 and 0.045

respectively) at pH 3.85,  $C_{\text{phen}} = 3.0 \text{ mM}$ ,  $I = 1.0 \text{ M}$  ( $\text{NaNO}_3$ ),  $T = 25.0 \text{ }^\circ\text{C}$ . (vii) is the spectrum of equilibrium mixture of stoichiometric amount of complex and ascorbic acid solutions (both at  $0.05 \text{ mM}$ ) at  $C_{\text{phen}} = 3.0 \text{ mM}$ ,  $I = 1.0 \text{ M}$  ( $\text{NaNO}_3$ ) and  $T = 25.0 \text{ }^\circ\text{C}$ . The isosbestic point at  $388 \text{ nm}$  is shown in this figure (see text). The spectrum of the pure diiron(III,III) complex does not pass through the isosbestic at  $388 \text{ nm}$ .
